# Supplementary material for: Imaging, myeloid precursor immortalization, and genome editing for defining mechanisms of leukocyte recruitment in vivo
Source: PubMed Central journal article supplement — Theranostics. 2018 Mar 23;8(9):2407–23. doi: 10.7150/thno.23632 (PMC5928898; doi:10.7150/thno.23632), 2018-03-23
Supplement: thnov08p2407s1.pdf [file thnov08p2407s1.pdf]

Figure S1

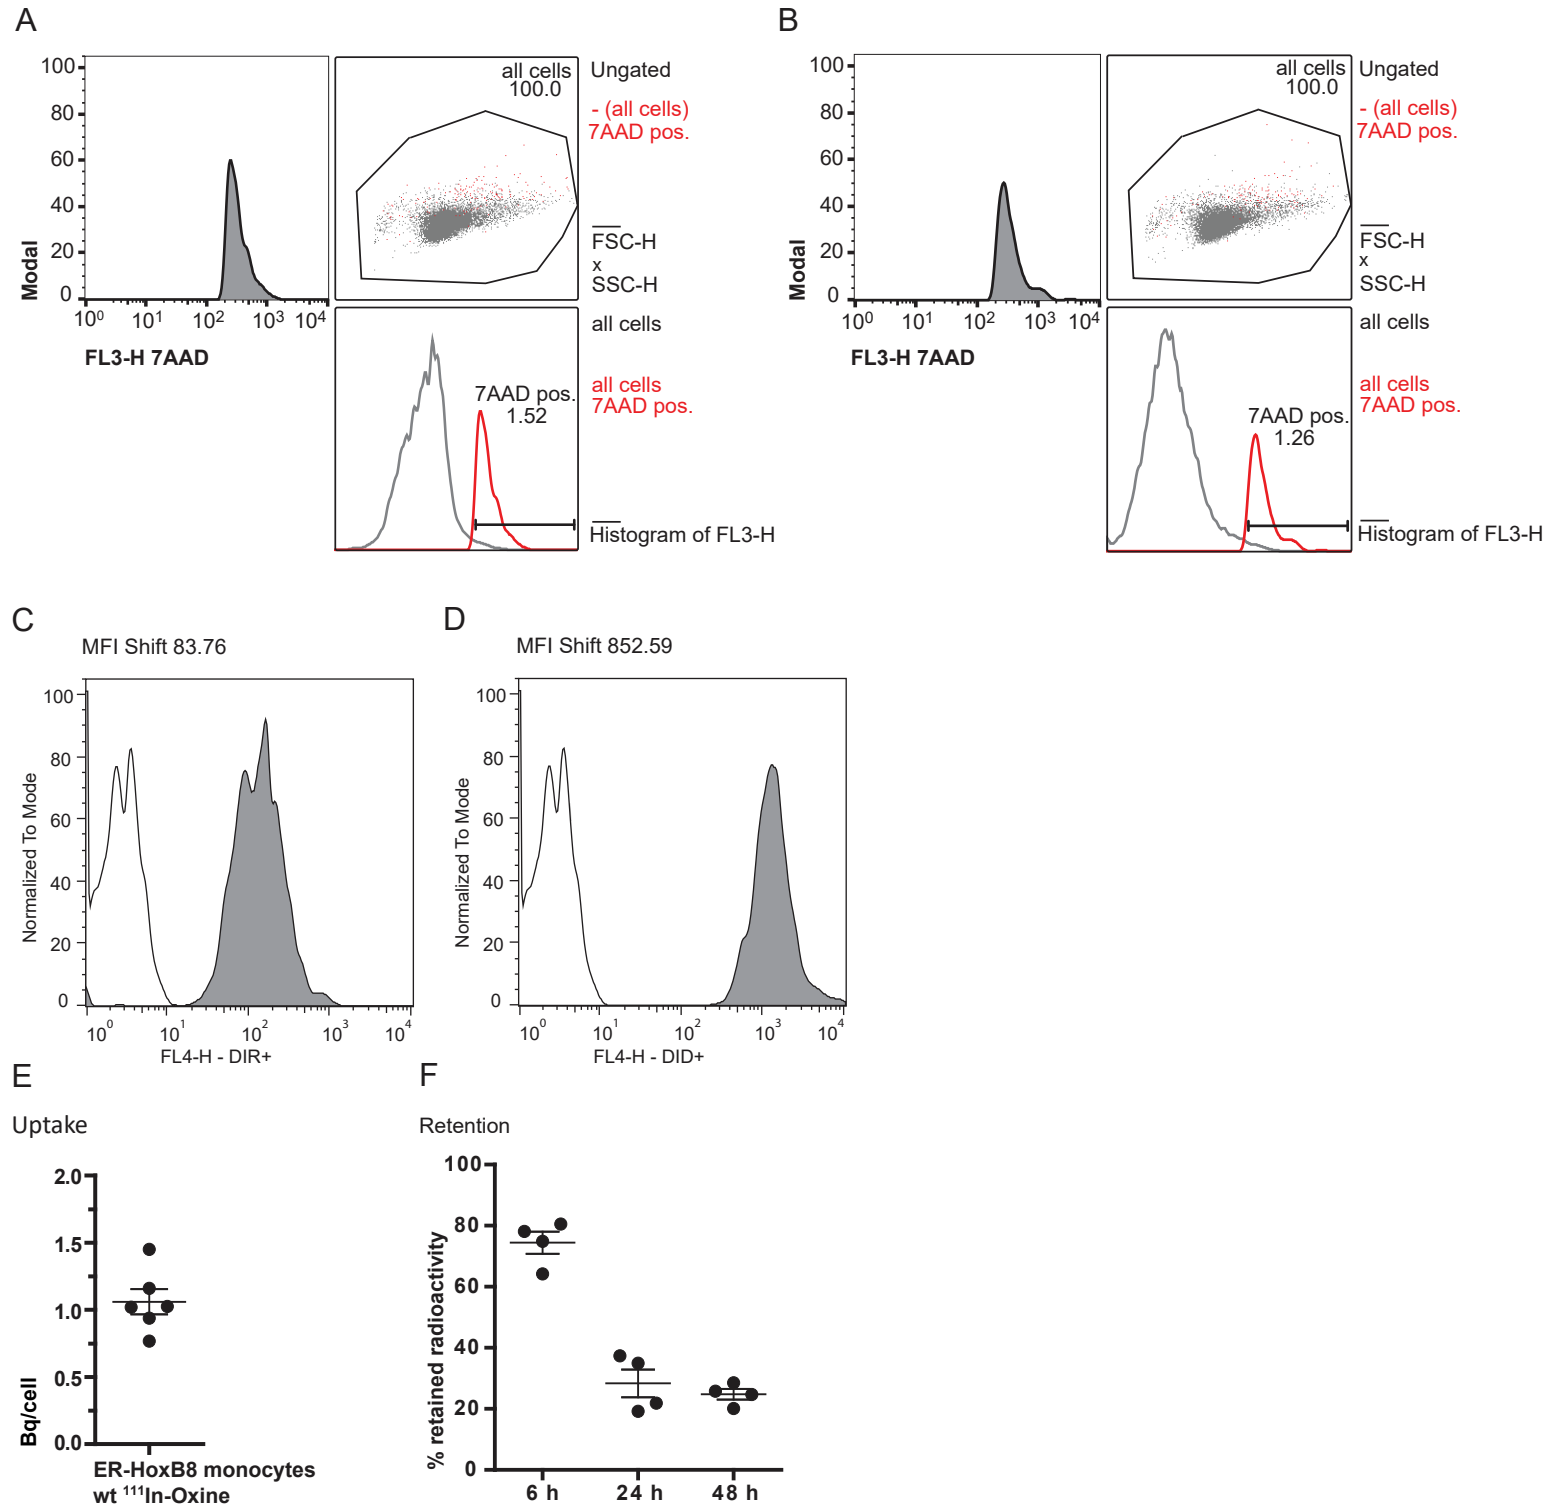

Figure S2

A

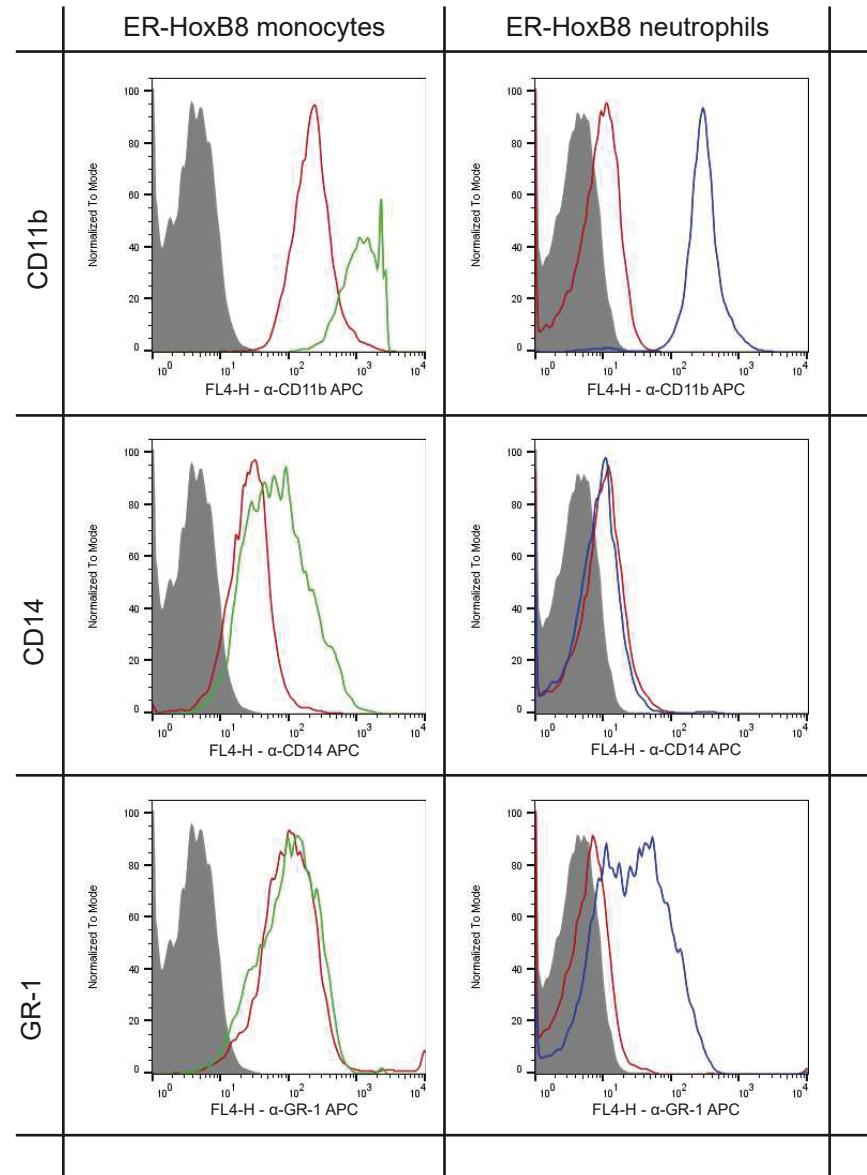

B

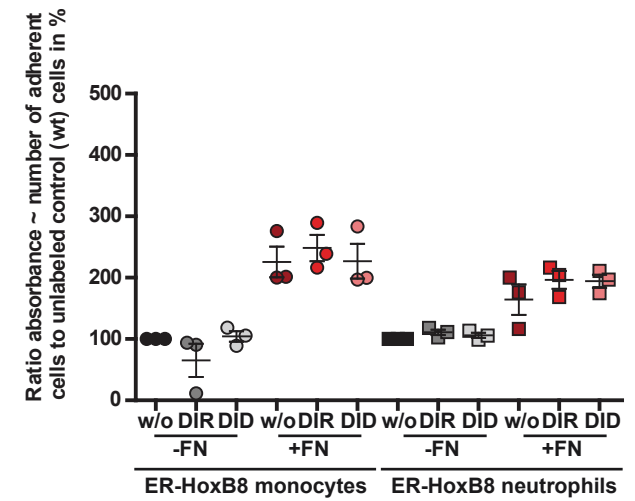

C

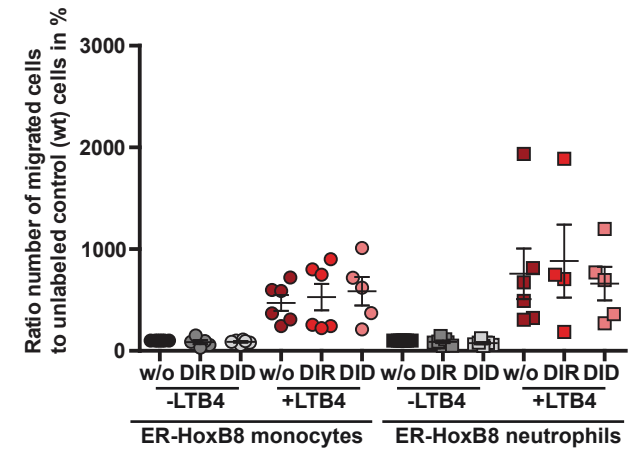

D

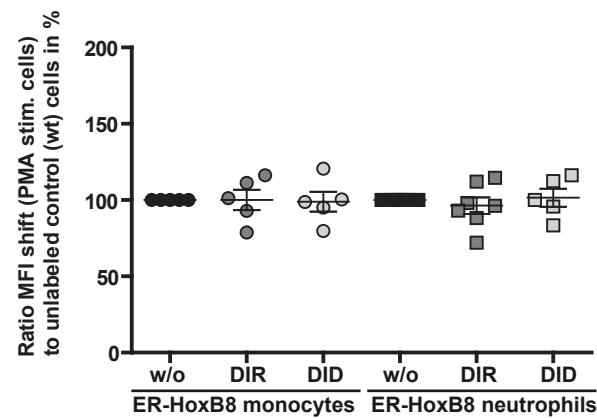

E

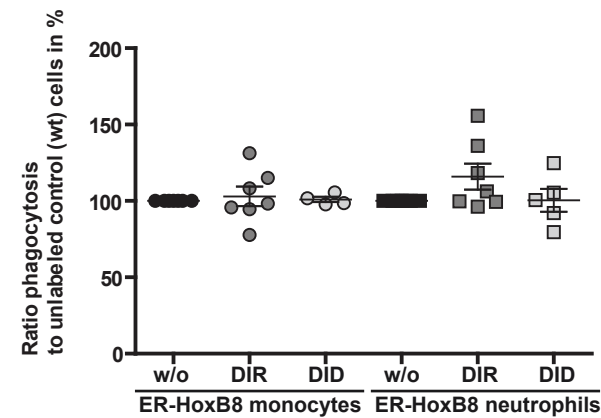

F

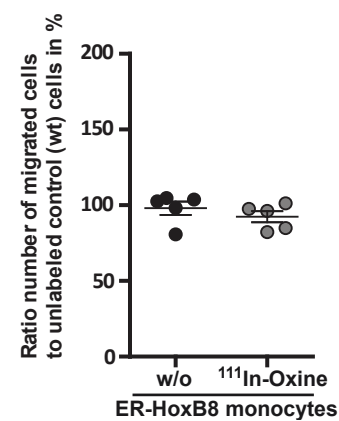

Figure S3

A

ER-HoxB8 monocytes wt <sup>111</sup>In-Oxine

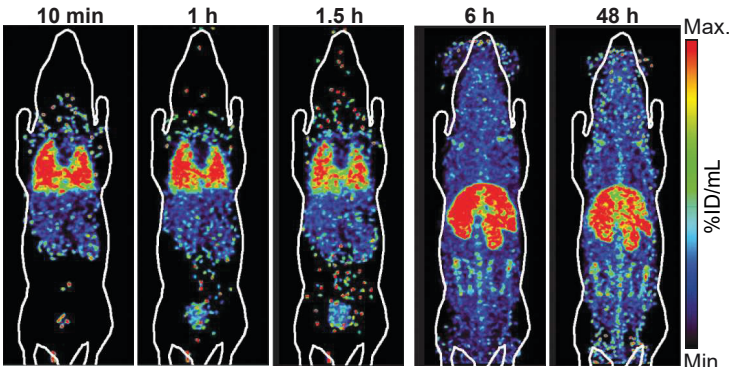

B

ER-HoxB8 monocytes wt <sup>111</sup>In-Oxine

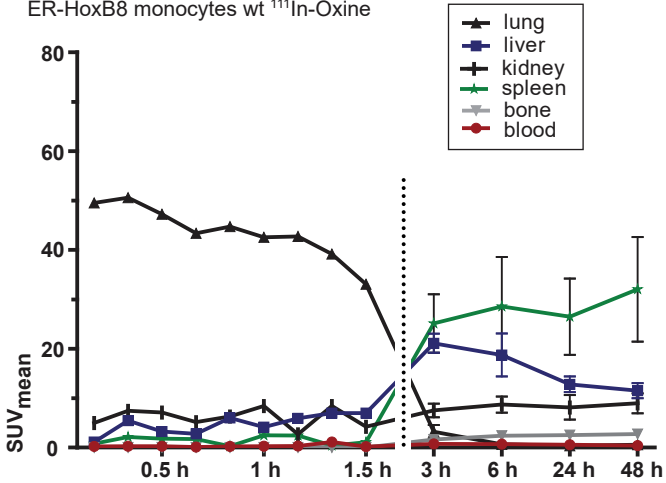

Figure S4

A

One color imaging

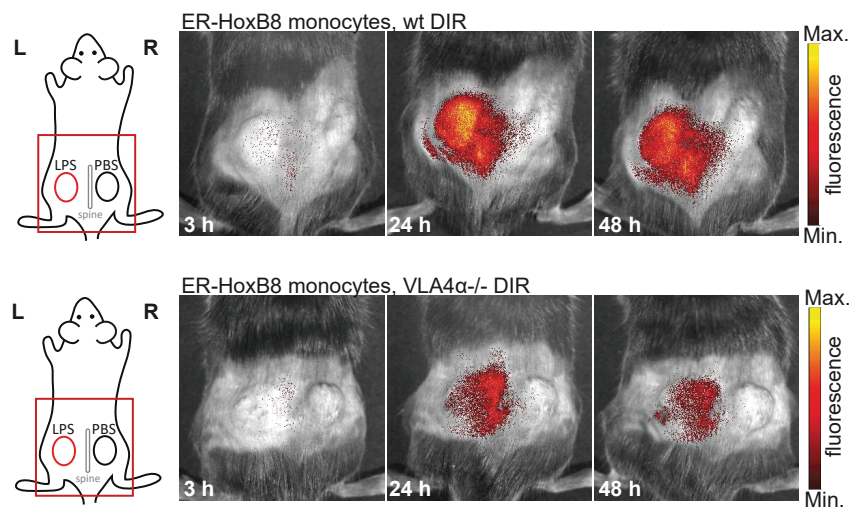

B

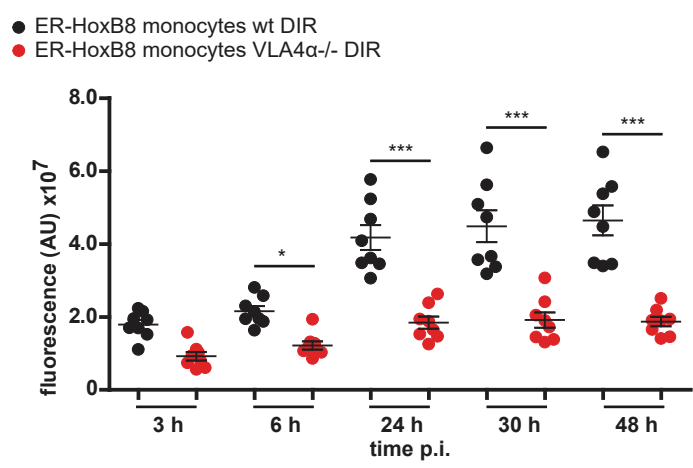

Figure S5

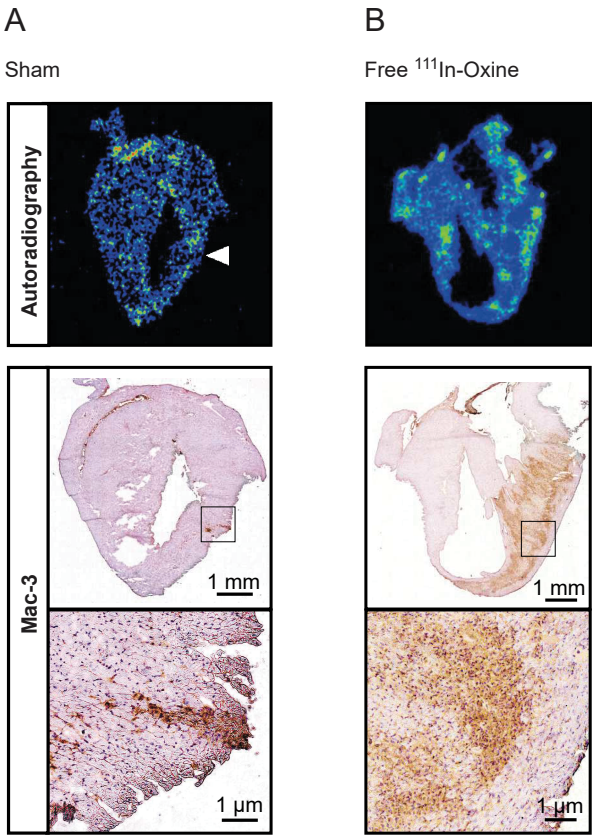

**Figure S1: Flow cytometry analysis of viability and labeling efficiency of DIR and DID labeled ER-HoxB8 monocytes and uptake and retention of <sup>111</sup>In-Oxine labeled ER-HoxB8 monocytes.**

ER-HoxB8 *wildtype* (wt) monocytes were labeled with DIR or DID (A-D) and <sup>111</sup>In-Oxine, respectively (E-F). (A) 7-Aminoactinomycin (7AAD) staining for living/dead cells after DIR labeling procedure. 7AAD positive cells can be detected in FL3-H. (B) 7AAD staining for living/dead cells after DID labeling procedure. 7AAD positive cells can be detected in FL3-H. (C) Labeling efficiency (MFI Shift) for DIR labeling. Labeled cells can be detected in FL4-H. (D) Labeling efficiency for DID labeling. Labeled cells can be detected in FL4-H. (E) Absolute uptake of <sup>111</sup>In-Oxine into ER-HoxB8 monocytes (n=6 independent experiments). (F) Retention of radioactivity after 6 h, 24 h and 48 h of culturing labeled cells (n=4 independent experiments). (A-D) Representative histograms depicted, open graphs represent unlabeled control cells, solid grey graphs represent DIR/DID labeled ER-HoxB8 cells. (E-F) Data shown as dotplots with mean ± SEM, retention data (F) was corrected for radioactive decay.

**Figure S2: *In vitro* functional assays of labeled ER-HoxB8 *wildtype* monocytes and neutrophils.**

ER-HoxB8 *wildtype* progenitor cells were differentiated to monocytes (GM-CSF) or neutrophils (SCF). (A) Representative flow cytometry analysis of surface marker expression of undifferentiated/differentiated monocytic or neutrophilic cells. Tinted grey histograms: isotype control, open histograms: red: day 0, blue: differentiated neutrophils, green: differentiated monocytes. Differentiated cells were labeled with DIR/DID (B-E) or <sup>111</sup>In-Oxine (F) or left untreated. Cell functionality was checked by (B) adhesion-, (C, F) transwell migration-, (D) ROS production- and (E) phagocytosis assay. (B) Adhesion of labeled ER-HoxB8 monocytes/neutrophils on plastic surface with or w/o fibronectin (25 µg/mL) as compared to unlabeled control cells (n=3 independent experiments). (C) Transwell migration of labeled ER-HoxB8 monocytes/neutrophils with or w/o LTB4 (12 nM) stimulation as compared to unlabeled control cells (Mono wt DIR: n=5, Mono wt DID: n=6, Mono wt LTB4: n=6, Mono wt DIR LTB4: n=6, Mono wt DID LTB4: n=5, Neutro wt DIR: n=7, Neutro wt DID: n=7, Neutro wt LTB4: n=6, Neutro wt DIR LTB4: n=4, Neutro wt DID LTB4: n=5 independent experiments). (D) ROS production of labeled ER-HoxB8 monocytes/neutrophils after PMA stimulation (100 nM) as compared to unlabeled control cells shown as ratio of MFI shifts of FL1-H (Mono: n=5, Neutro wt: n=7, Neutro wt DIR: n=7, Neutro wt DID: n=5 independent experiments). (E) Phagocytosis of latex beads of labeled ER-HoxB8 monocytes/neutrophils as compared to unlabeled control cells (Mono wt: n=7, Mono wt DIR: n=7, Mono wt DID: n=4, Neutro wt: n=7, Neutro wt DIR: n=7, Neutro wt DID: n=5 independent experiments). (F) Transwell migration of labeled ER-HoxB8 monocytes as compared to unlabeled control cells (n=5 independent experiments). Data shown as dotplots with mean ± SEM, normalized to untreated, unlabeled ER-HoxB8 wt monocytes or neutrophils (set as 100 %).

**Figure S3: Whole-body biodistribution dynamics of <sup>111</sup>In-Oxine labeled ER-HoxB8 *wildtype* monocytes in healthy mice.**

ER-HoxB8 *wildtype* cells were labeled with <sup>111</sup>In-Oxine, injected in healthy C57 BL/6 mice and their distribution was analyzed by SPECT imaging over the first 90 min, 3 h, 6 h, 24 h and 48 h (90 min: n=1, 3 h: n=3, 6 h: n=4, 24 h/48 h: n=5 independent experiments) p.i. Images show maximum intensity projections. Data is displayed as mean ± SD. SUV = standardized uptake units.

**Figure S4: *In vivo* one color imaging of wt and *VLA4α*<sup>-/-</sup> monocyte migration in a CG model.**

ER-HoxB8 *wildtype* and *VLA4α*<sup>-/-</sup> monocytes were labeled with DIR and each cell population was injected in an individual animal (A-B). FRI images were taken 0 h, 3 h, 6 h, 24 h, 30 h and 48 h p.i. (A) Representative imaging series of one color imaging approach in two individual mice 3 h-48 h p.i. Upper panel shows LPS plug infiltration of ER-HoxB8 wt monocytes (DIR). Lower panel shows LPS plug infiltration of *VLA4α*<sup>-/-</sup> monocytes (DIR). (B) Statistical analysis of imaging of ER-HoxB8 wt or *VLA4α*<sup>-/-</sup> cell migration to LPS plug (left) corresponding to experimental setting in (A) (n=8 mice, 3 independent experiments). Images orientation: L = left, R = right, fluorescence = fluorescence intensity (AU). Data shown as dotplot with mean ± SEM, corrected to baseline and labeling efficiency. Statistical significance was calculated using 2-way ANOVA and Bonferroni posttests comparing ER-HoxB8 *wildtype* and *VLA4α*<sup>-/-</sup> cells: \*p < 0.05, \*\*p < 0.01, \*\*\*p < 0.001.

**Figure S5: Migration of  $^{111}\text{In}$ -Oxine labeled ER-HoxB8 *wildtype* monocytes in sham operated animals and distribution of free labeling agents in myocardial infarction.** (A) ER-HoxB8 *wildtype* cells were labeled with  $^{111}\text{In}$ -Oxine and injected 1 day after sham surgery. Autoradiographic analysis shows no specific signal from  $^{111}\text{In}$ -Oxine labeled cells. Immunohistochemical staining for Mac-3 revealed positive cells only at the site of ligation. (B) Free  $^{111}\text{In}$ -Oxine was injected 1 day after coronary artery ligation. Representative autoradiographic image showing no specific accumulation of free  $^{111}\text{In}$ -Oxine in the infarct zone. On histological slides  $\alpha$ -Mac-3 staining defines the area of infarction and was clearly distinguishable from the remote myocardial tissue by its broad positive Mac-3 signal.
